# Supplementary material for: Survival Trend in Individuals With De Novo Metastatic Prostate Cancer After the Introduction of Doublet Therapy
Source: PubMed Central journal article supplement (PMC10546238; doi:10.1001/jamanetworkopen.2023.36604), 2023-10-02
Supplement: jamanetwopen-e2336604-s002.pdf [file jamanetwopen-e2336604-s002.pdf]

## Data Sharing Statement

Corsini. Survival Trend in Individuals With De Novo Metastatic Prostate Cancer After the Introduction of Doublet Therapy. *JAMA Netw Open*. Published October 02, 2023.  
doi:10.1001/jamanetworkopen.2023.36604

### Data

**Data available:** No

### Additional Information

**Explanation for why data not available:** Data used for the current study have been extracted from PCBaSe. Data can be made available on a remote server upon request to the PCBaSe reference group, contact par.stattin@uu.se. The code used for the analyses can be provided on request by marcus.westerberg@uu.se.
